# Supplementary material for: Emerging role of mutations in epigenetic regulators including MLL2 derived from The Cancer Genome Atlas for cervical cancer
Source: Springer Nature journal article supplement (doi:10.1186/s12885-017-3257-x), 2017-04-08

Stage I

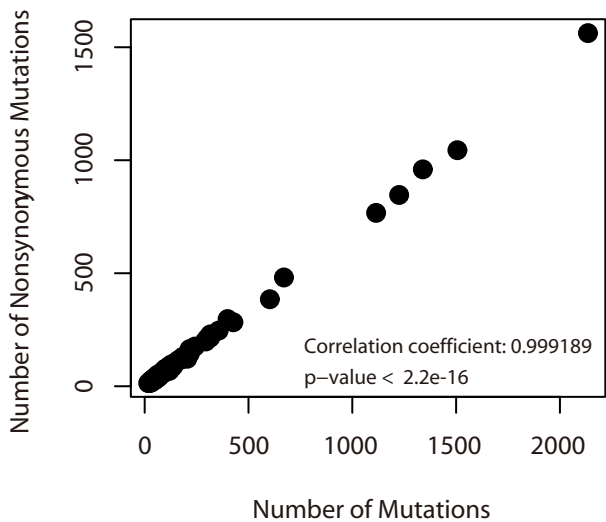

Stage II

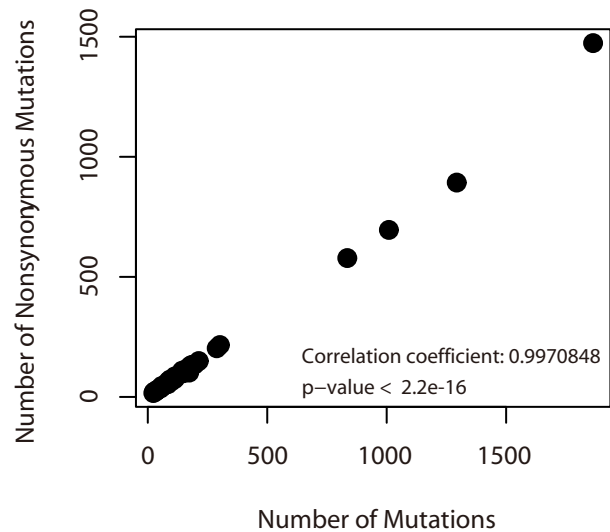

Stage III

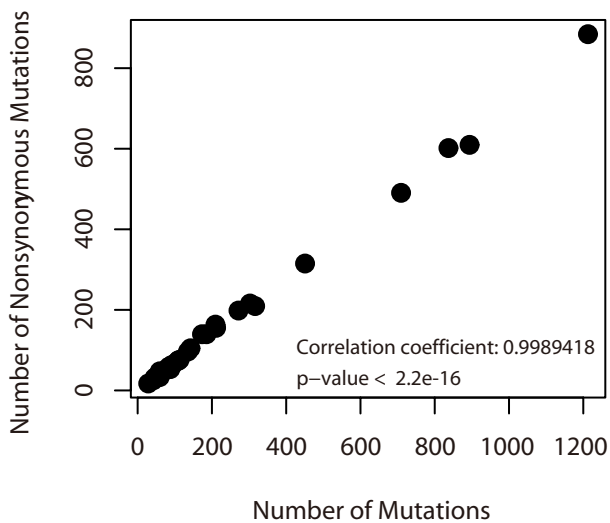

Stage IV

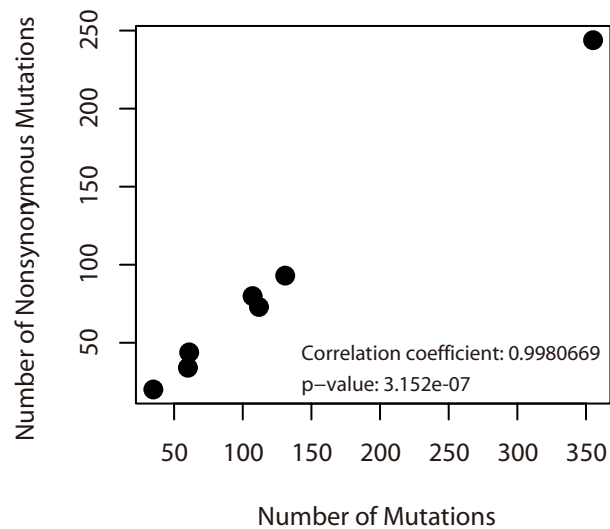

Supplement: MOESM2 [file 12208710]
