# Supplementary material for: Emerging role of mutations in epigenetic regulators including MLL2 derived from The Cancer Genome Atlas for cervical cancer
Source: BMC Cancer. 2017 Apr 8;17:252. doi: 10.1186/s12885-017-3257-x (PMC5385072; doi:10.1186/s12885-017-3257-x)
Supplement: Supplementary file 4 — Driver genes and core pathways. (XLS 33 kb) [file 12885_2017_3257_MOESM4_ESM.xls]

## Sheet: DriverGeneInfo
Table S2. Driver genes and core pathways
Gene	Core Pathway	IntOgen Reported
ABL1	Cell Cycle/Apoptosis	No
ACVR1B	TGF-b	Yes
AKT1	PI3K	Yes
ALK	PI3K; RAS	Yes
APC	APC	Yes
AR	Transcriptional Regulation	No
ARID1A	Chromatin Modification	Yes
ARID1B	Chromatin Modification	Yes
ARID2	Chromatin Modification	Yes
ASXL1	Chromatin Modification	Yes
ATM	DNA Damage Control	Yes
ATRX	Chromatin Modification	Yes
AXIN1	APC	Yes
B2M	PI3K; RAS; MAPK	Yes
BAP1	DNA Damage Control	Yes
BCL2	Cell Cycle/Apoptosis	No
BCOR	Transcriptional Regulation	Yes
BRAF	RAS	Yes
BRCA1	DNA Damage Control	Yes
BRCA2	DNA Damage Control	Yes
CARD11	Cell Cycle/Apoptosis	No
CASP8	Cell Cycle/Apoptosis	Yes
CBL	PI3K; RAS	No
CDC73	Cell Cycle/Apoptosis	Yes
CDH1	APC	Yes
CDKN2A	Cell Cycle/Apoptosis	Yes
CEBPA	PI3K; RAS; MAPK	Yes
CIC	RAS	Yes
CREBBP	Chromatin Modification; Transcriptional Regulation	Yes
CRLF2	STAT	No
CSF1R	PI3K; RAS	No
CTNNB1	APC	Yes
CYLD	Cell Cycle/Apoptosis	Yes
DAXX	Chromatin Modification; Cell Cycle/Apoptosis	No
DNMT1	Chromatin Modification	No
DNMT3A	Chromatin Modification	Yes
EGFR	PI3K; RAS	Yes
EP300	Chromatin Modification; APC; TGF-b; NOTCH	Yes
ERBB2	PI3K; RAS	Yes
EZH2	Chromatin Modification	Yes
FAM123B	APC	Yes
FBXW7	NOTCH	Yes
FGFR2	PI3K; RAS ; STAT	Yes
FGFR3	PI3K; RAS ; STAT	Yes
FLT3	RAS; PI3K; STAT	Yes
FOXL2	TGF-b	No
FUBP1	Cell Cycle/Apoptosis	Yes
GATA1	NOTCH, TGF-b	No
GATA2	NOTCH, TGF-b	No
GATA3	Transcriptional Regulation	Yes
GNA11	PI3K; RAS; MAPK	Yes
GNAQ	PI3K;RAS; MAPK	No
GNAS	APC; PI3K; TGF-b, RAS	Yes
H3F3A	Chromatin Modification	No
HIST1H3B	Chromatin Modification	No
HNF1A	APC	Yes
HRAS	RAS	Yes
IDH1	Chromatin Modification	Yes
IDH2	Chromatin Modification	Yes
JAK1	STAT	No
JAK2	STAT	No
JAK3	STAT	No
KDM5C	Chromatin Modification	Yes
KDM6A	Chromatin Modification	Yes
KIT	PI3K; RAS; STAT	Yes
KLF4	Transcriptional Regulation; WNT	Yes
KRAS	RAS	Yes
MAP2K1	RAS	Yes
MAP3K1	RAS; MAPK	Yes
MED12	Cell Cycle/Apoptosis; TGF-b	Yes
MEN1	Chromatin Modification	Yes
MET	PI3K; RAS	Yes
MLH1	DNA Damage Control	Yes
KMT2D	Chromatin Modification	Yes
KMT2C	Chromatin Modification	Yes
MPL	STAT	No
MSH2	DNA Damage Control	No
MSH6	DNA Damage Control	No
MYD88	Cell Cycle/Apoptosis	Yes
NCOR1	Chromatin Modification	Yes
NF1	RAS	Yes
NF2	APC	Yes
NFE2L2	Cell Cycle/Apoptosis	Yes
NOTCH1	NOTCH	Yes
NOTCH2	NOTCH	Yes
NPM1	Cell Cycle/Apoptosis	Yes
NRAS	RAS	Yes
PAX5	Chromatin Modification	Yes
PBRM1	Chromatin Modification	Yes
PDGFRA	PI3K; RAS	No
PHF6	Transcriptional Regulation	Yes
PIK3CA	PI3K	Yes
PIK3R1	PI3K	Yes
PPP2R1A	Cell Cycle/Apoptosis	Yes
PRDM1	Chromatin Modification	No
PTCH1	HH	Yes
PTEN	PI3K	Yes
PTPN11	RAS	Yes
RB1	Cell Cycle/Apoptosis	Yes
RET	RAS; PI3K	No
RNF43	APC	No
RUNX1	Transcriptional Regulation	Yes
SETD2	Chromatin Modification	Yes
SETBP1	Chromatin Modification; Replication	No
SF3B1	Transcriptional Regulation	Yes
SMAD2	TGF-b	Yes
SMAD4	TGF-b	Yes
SMARCA4	Chromatin Modification	Yes
SMARCB1	Chromatin Modification	Yes
SMO	HH	Yes
SOCS1	STAT	No
SOX9	APC	Yes
SPOP	Chromatin Modification; HH	Yes
SRSF2	Transcriptional Regulation	No
STAG2	DNA Damage Control	Yes
STK11	mTOR	Yes
TET2	Chromatin Modification	Yes
TNFAIP3	Cell Cycle/Apoptosis; MAPK	No
TRAF7	Apoptosis	No
TP53	Cell Cycle/Apoptosis; DNA Damage Control	Yes
TSC1	PI3K	Yes
TSHR	PI3K; MAPK	No
U2AF1	Transcriptional Regulation	Yes
VHL	PI3K; RAS; STAT	Yes
WT1	Chromatin Modification	Yes
CCND1	Cell Cycle/Apoptosis	Yes
CDKN2C	Cell Cycle/Apoptosis	No
IKZF1	Transcriptional Regulation	No
LMO1	Transcriptional Regulation	No
MAP2K4	MAPK	Yes
MDM2	Cell Cycle/Apoptosis	No
MDM4	Cell Cycle/Apoptosis	No
MYC	Cell Cycle/Apoptosis	Yes
MYCL1	Cell Cycle/Apoptosis	No
MYCN	Cell Cycle/Apoptosis	Yes
NCOA3	Chromatin Modification	No
NKX2-1	PI3K; MAPK	No
SKP2	Cell Cycle/Apoptosis	No
